# Supplementary material for: The Diagnostic and Prognostic Value of Coronary Calcium Scoring in Stable Chest Pain Patients: A Narrative Review
Source: PubMed Central journal article supplement — Rofo. 2022 Jan 26;194(3):257–65. doi: 10.1055/a-1662-5711 (PMC8837467; doi:10.1055/a-1662-5711), 2022-01-26
Supplement: roefo-3568_10-1055-a-1662-5711-s.pdf [file roefo-3568_10-1055-a-1662-5711-s.pdf]

## SUPPLEMENT 1: METHOD

For this narrative review, the following search was performed in PubMed, Embase, and Web of Science with an update on April 20, 2021 (table). Duplicates and articles not written in English were excluded (Figure 1). The remaining articles were screened based on title and abstract and the full text of relevant articles was screened by one author (MYK) and were deemed relevant for this review if 1) the study population consisted of only stable chest pain patients, AND 2) the CCS was determined on cardiac CT without intravenous contrast, AND EITHER 3) diagnostic evaluation of coronary artery disease as the primary endpoint was performed, described per CCS category, OR 4) prognostic evaluation of major adverse cardiovascular events (MACE) as outcome was performed, described per CCS category. The references of the articles that fulfilled the previous criteria were also screened and relevant articles were included. Articles were excluded if: no full text could be found, the article did not meet the primary endpoints, the article determined CCS through contrast-enhanced CT scans, the article described guidelines, study protocols, editorials, or validation tools or primarily focused on specific patient populations (e.g., asymptomatic patients, patients with diabetes, rheumatoid arthritis), cost-effectiveness, biomarkers, or risk factors. In addition, reviews were excluded, for example, those that primarily focused on asymptomatic and symptomatic chest pain patients together, acute chest pain patients, or different (CT) technical applications.

This search included 2398 articles (Figure 1). Duplicate articles and articles not written in English were excluded leaving 1627 articles to be screened based on title and abstract. The full text of the remaining 223 articles was screened, resulting in the exclusion of 190 articles. The references of the remaining 33 articles were then screened resulting in a 9 additional articles. The flowchart (Figure 1) shows the result of the search and the inclusion and exclusion criteria. Eventually, a total of 42 articles were included in this review. Of these, 19 focused on the diagnostic value of CCS and 13 on the prognostic value of CCS. 10 articles described both the diagnostic and prognostic value of CCS.

| <b>Table: Searches performed in PubMed, Embase, and Web of Science</b>                                                                        |                                                                                                                                                                                                                                                                                                                                                                                                                                                                                                                                                                                                                                                                                                                                                                                     |
|-----------------------------------------------------------------------------------------------------------------------------------------------|-------------------------------------------------------------------------------------------------------------------------------------------------------------------------------------------------------------------------------------------------------------------------------------------------------------------------------------------------------------------------------------------------------------------------------------------------------------------------------------------------------------------------------------------------------------------------------------------------------------------------------------------------------------------------------------------------------------------------------------------------------------------------------------|
| PubMed                                                                                                                                        | ("Tomography"[Mesh] OR "Tomography, X-Ray Computed"[Mesh] OR computed tomograph*[tiab] OR computerized tomography[tiab] OR CT [tiab] OR CT scan*[tiab] OR imaging test*[tiab] OR cardiac CT[tiab]) AND ("Chest Pain"[Mesh] OR chest pain*[tiab] OR angina pectoris[tiab] OR angina[tiab] OR typical chest pain*[tiab] OR atypical chest pain*[tiab] OR non-specific chest pain*[tiab]) AND ("Vascular Calcification"[Mesh] AND "Coronary Vessels"[Mesh] OR Coronary artery calcium score*[tiab] OR coronary calcium score*[tiab] OR CAC[tiab]OR CCS[tiab] OR 'coronary artery calcification'[tiab] OR coronary calcification* [tiab] OR coronary artery calcium[tiab] OR calcium score*[tiab] OR calcification*[tiab] OR calcium[tiab] OR calcified[tiab] OR Agatston score[tiab]). |
| Embase                                                                                                                                        | 'computer assisted tomography'/exp OR 'x-ray computed tomography'/exp OR 'computed tomograph*':ti,ab,kw OR 'computerized tomography':ti,ab,kw OR 'CT':ti,ab,kw OR 'CT scan*':ti,ab,kw OR 'imaging test*':ti,ab,kw OR 'cardiac CT':ti,ab,kw<br>AND 'thorax pain'/exp OR 'angina pectoris'/exp OR 'typical chest pain*':ti,ab,kw OR 'atypical chest pain*':ti,ab,kw OR 'non-specific chest pain*':ti,ab,kw AND 'coronary artery calcium score'/exp OR 'CAC':ti,ab,kw OR 'CCS':ti,ab,kw OR 'calcification*':ti,ab,kw OR 'Agatston score':ti,ab,kw                                                                                                                                                                                                                                      |
| Web of Science                                                                                                                                | TS= 'computed tomography OR 'CT scan' OR 'Cardiac CT'<br>AND TS= 'Chest Pain*' OR 'angina pectoris' OR 'typical chest pain*' OR 'atypical chest pain*' OR 'non-specific chest pain*' AND TS= 'coronary calcium score*' OR 'Coronary artery calcium score*' OR 'CAC' OR 'CCS' OR coronary artery calcification* OR 'coronary calcification*' OR 'calcium score*' OR 'calcification*' OR 'calcified' OR 'Agatston score'                                                                                                                                                                                                                                                                                                                                                              |
| Mesh=Medical Subject Headings. tiab= title and abstract. exp= exact Emtree term, exploded. ti.ab.kw= title, abstract and keywords. TS= topic. |                                                                                                                                                                                                                                                                                                                                                                                                                                                                                                                                                                                                                                                                                                                                                                                     |

► **Supplementary Table 1** Diagnostic value of CCS 0 in stable chest pain patients.

| First author (year)                              | Population (N, % men, mean age ± SD)                                                   | CT system               | cCTA ≥ 50 % luminal stenosis N (%) | Total number of patients with a CCS 0 N (%*) | Total number of CCS 0 patients with OCAD N (%) | Total number of CCS 0 patients with non-OCAD N (%) |
|--------------------------------------------------|----------------------------------------------------------------------------------------|-------------------------|------------------------------------|----------------------------------------------|------------------------------------------------|----------------------------------------------------|
| <b>Low pre-test probability</b>                  |                                                                                        |                         |                                    |                                              |                                                |                                                    |
| Kwon (2011)                                      | N = 3979, 44 % men<br>Age: 60 ± 10                                                     | 64-slice MDCT           | 622 (16)                           | 2406 (61)                                    | 90 (3.7)                                       | n.r.                                               |
| Nicoll (2016)                                    | N = 5515, 61 % men<br>Age: 60 ± 12                                                     | 64-slice MDCT           | 1538 (28)                          | 1897 (34)                                    | 109 (5.7)                                      | n.r.                                               |
| Yerramasu (2014)                                 | N = 300, 48 % men<br>Age: 60.6 ± 9.6                                                   | First-generation DSCCT  | 90 (30)                            | 131 (44)                                     | 2 (1.5) <sup>§</sup>                           | n.r.                                               |
| Wang (2019)                                      | N = 1753, 46 % men<br>Age: 57 ± 12                                                     | Second-generation DSCCT | 222 (15)                           | 915 (52)                                     | 14 (1.9)                                       | 63 (7)                                             |
| <b>Low and intermediate pre-test probability</b> |                                                                                        |                         |                                    |                                              |                                                |                                                    |
| van Werkhoven (2009)                             | N = 432, 59 % men<br>Age: 58 ± 11                                                      | 64-slice MDCT           | 109 (25)                           | 70 (34)                                      | 9 (7.2)                                        | 9 (18)                                             |
| van Werkhoven (2010)                             | N = 576, 47 % men<br>Age: 56 ± 12<br>Typical: 21 %, atypical: 43 %, non-anginal: 36 %  | 64-slice MDCT           | 168 (29)                           | 242 (42)                                     | 14 (5.8)                                       | n.r.                                               |
| Villines (2011)                                  | N = 10 037, 56 % men<br>Age: 57 ± 11<br>Typical: 13 %                                  | 64-slice MDCT           | 2069 (21)                          | 5128 (51)                                    | 244 (5.1)                                      | 667 (13)                                           |
| Kim (2012)                                       | N = 2088, 49 % men<br>Age: 59 ± 10<br>Typical: 16 %, atypical: 44 %, non-anginal: 40 % | 64-slice MDCT           | 444 (21)                           | 1114 (53)                                    | 48 (2.2)                                       | n.r.                                               |
| Born (2016)                                      | N = 1551, 38 % men<br>Age: 58 ± 10                                                     | 64-slice MDCT           | 214 (14)                           | 739 (48)                                     | 23 (3.1)                                       | 62 (8.4)                                           |
| Van der Zant (2015)                              | N = 1014, 0 % men<br>Age: 59 ± 10<br>Atypical: 100 %                                   | Second-generation DSCCT | 494 (49)                           | 557 (55)                                     | 8 (1.5)**                                      | 37 (7)**                                           |
| Senoner (2020)                                   | N = 1451, 49 % men<br>Age: 53 ± 11<br>Symptomatic: 66 %, asymptomatic: 34 %            | Second-generation DSCCT | 93 (6)                             | 1289 (89)                                    | 66 (5.1)                                       | 268 (21)                                           |

► Supplementary Table 1 (Continuation)

| First author (year)                               | Population (N, % men, mean age ± SD)                                                  | CT system             | cCTA ≥ 50 % luminal stenosis N (%) | Total number of patients with a CCS 0 N (%) | Total number of CCS 0 patients with OCAD N (%) | Total number of CCS 0 patients with non-OCAD N (%) |
|---------------------------------------------------|---------------------------------------------------------------------------------------|-----------------------|------------------------------------|---------------------------------------------|------------------------------------------------|----------------------------------------------------|
| <b>Intermediate pre-test probability</b>          |                                                                                       |                       |                                    |                                             |                                                |                                                    |
| Hulten (2014)                                     | N = 1145, 63 % men<br>Age: 55 ± 12                                                    | 64-slice MDCT         | 285 (42)                           | 83 (7.3)                                    | 9 (1.9)                                        | 81 (17)                                            |
| Nieman (2009)                                     | N = 471, 57 % men<br>Age: 56 ± 10<br>Typical: 31 %, atypical: 53 %, non-anginal: 16 % | First-generation DSCT | 140 (31) <sup>y</sup>              | 175 (37)                                    | 3 (2)                                          | n.r.                                               |
| Meyer (2012)                                      | N = 383, 62 % men<br>Age: 58 ± 13<br>Typical: 81 %, atypical: 19 %                    | First-generation DSCT | 114 (30)                           | 121 (32)                                    | 0 (0)                                          | n.r.                                               |
| Kaczmarek (2013)                                  | N = 1132, 47 % men<br>Age: 58.7 ± 10.9                                                | First-generation DSCT | 272 (24)                           | 668 (59) <sup>***</sup>                     | 56 (8.4) <sup>***</sup>                        | n.r.                                               |
| <b>Intermediate and high pre-test probability</b> |                                                                                       |                       |                                    |                                             |                                                |                                                    |
| Gottlieb (2010)                                   | N = 291, 73 % men<br>Age: 59 ± 10                                                     | 64-slice MDCT         | 163 (56)                           | 72 (25)                                     | 14 (19)                                        | n.r.                                               |
| Dedic (2013)                                      | N = 756, 51 % men<br>Age: 56 ± 10                                                     | First-generation DSCT | 10 (1)                             | 281 (37)                                    | 10 (3.6)                                       | n.r.                                               |
| <b>High pre-test probability</b>                  |                                                                                       |                       |                                    |                                             |                                                |                                                    |
| LaMont (2002)                                     | N = 153, 76 % men<br>Age: 58 ± 9<br>Typical: 37 %, atypical: 39 %, non-anginal: 24 %  | Electron beam CT      | 112 (73)                           | 29 (19)                                     | 2 (7)                                          | n.r.                                               |
| Drosch (2010)                                     | N = 500, 75 % men<br>Age: 63 ± 10                                                     | 16 or 64-slice MDCT   | 16 (3) <sup>y</sup>                | 61 (12)                                     | 16 (26)                                        | 45 (74)                                            |
| <b>Type of symptoms</b>                           |                                                                                       |                       |                                    |                                             |                                                |                                                    |
| Ho (2008)                                         | N = 664, 84 % men<br>Age: 62 ± 9<br>Atypical: 10 %                                    | 64-slice MDCT         | 86 (13)                            | 92 (14)                                     | 0 (0)                                          | n.r.                                               |
| Akram (2009)                                      | N = 210, 47 % men<br>Age: 57 ± 11.8<br>Typical/atypical: 64 %, non-anginal: 36 %      | 64-slice MDCT         | 28 (21)                            | 70 (34)                                     | 4 (5.7)                                        | n.r.                                               |
| Knez (2004)                                       | N = 2115, 66 % men<br>Age: 62<br>Typical/atypical: 80 %, non-anginal: 20 %            | Electron beam CT      | 1255 (59)                          | 334 (16)                                    | 8 (2.4)                                        | n.r.                                               |

▶ Supplementary Table 1 (Continuation)

| First author (year)                                          | Population (N, % men, mean age ± SD)                                                                     | CT system                              | cCTA ≥ 50 % luminal stenosis N (%) | Total number of patients with a CCS 0 N (%) <sup>*</sup> | Total number of CCS 0 patients with OCAD N (%) | Total number of CCS 0 patients with non-OCAD N (%) |
|--------------------------------------------------------------|----------------------------------------------------------------------------------------------------------|----------------------------------------|------------------------------------|----------------------------------------------------------|------------------------------------------------|----------------------------------------------------|
| Geluk (2008)                                                 | N = 304, 56 % men<br>Age: 55<br>Typical: 19 %, atypical: 74 %, other <sup>‡</sup> : 7 %                  | Electron beam CT                       | 38 (13)                            | 159 (52) <sup>***</sup>                                  | 0 (0)                                          | 2 (15)                                             |
| Ueda (2012)                                                  | N = 753, 70 % men<br>Age: 64.7 ± 10.7<br>Typical: 29 %, atypical: 20 %, asymptomatic <sup>‡</sup> : 51 % | First generation DSCT                  | 189 (25)                           | 260 (35)                                                 | 8 (3.1)                                        | n.r.                                               |
| <b>Pre-test probability or type of symptoms not reported</b> |                                                                                                          |                                        |                                    |                                                          |                                                |                                                    |
| Schmermund (2000)                                            | N = 323, 77 % men<br>Age: 55 ± 11                                                                        | Electron beam CT                       | 179 (55)                           | 117 <sup>***</sup>                                       | 17 (15)                                        | n.r.                                               |
| Feldman (2000)                                               | N = 22, 82 % men<br>Age: 59.6 ± 9                                                                        | Helical CT: double layers of detectors | 16 (89)                            | 8 (37)                                                   | 2 (25)                                         | 2 (25)                                             |
| Kiani (2020)                                                 | N = 219, 55 % men<br>Age: 63 ± 12.39                                                                     | 192-slice MDCT                         | 97 (44)                            | 128 <sup>***</sup>                                       | 36 (28)                                        | n.r.                                               |

Note: SD = standard deviation. CT = computed tomography. CCS = coronary calcium score. cCTA = coronary computed tomography angiography.

CAD = coronary artery disease. MDCT = multi-detector CT. DSCT = dual-source CT. Non-OCAD = non-obstructive coronary artery disease, luminal stenosis < 50 %. n.r. = not reported in the article.

<sup>\*</sup> percentage of patients with a CCS 0 in relation to the total population of the study.

<sup>\*\*</sup> due to non-calcified plaques.

<sup>\*\*\*</sup> CCS ≤ 10 or ≤ 15 or ≤ 100.

<sup>a</sup> clinical suspicion of CAD based on prior testing (e. g., resting ECG, exercise ECG test).

<sup>‡</sup> Based on invasive coronary angiography.

<sup>§</sup> based on ≥ 70 % stenosis.

<sup>‡</sup> arrhythmia, collapse, screening.

► **Supplementary Table 2** Diagnostic value of CCS > 0 in stable chest pain patients.

| First author (year)                              | Population (N, % men, mean age, SD)                                                    | CT system              | Total number of patients with CCS > 0 N (%) | Total number of CCS > 0 patients with OCAD N (%) | Total number of patients per CCS > 0 category (N)         | Total number of OCAD per CCS > 0 category N (%) |
|--------------------------------------------------|----------------------------------------------------------------------------------------|------------------------|---------------------------------------------|--------------------------------------------------|-----------------------------------------------------------|-------------------------------------------------|
| <b>Low pre-test probability</b>                  |                                                                                        |                        |                                             |                                                  |                                                           |                                                 |
| Kwon (2011)                                      | N = 3979, 44 % men<br>Age: 60 ± 10                                                     | 64-slice MDCT          | 1573 (40)                                   | 532 (34)                                         | 1–10 (287)<br>11–100 (708)<br>101–400 (369)<br>>400 (209) | 34 (12)<br>162 (23)<br>180 (49)<br>156 (75)     |
| Nicoll (2016)                                    | N = 5515, 61 % men<br>Age: 60 ± 12                                                     | 64-slice MDCT          | 3528 (64)                                   | 1429 (41)                                        |                                                           |                                                 |
| Yerramasu (2014)                                 | N = 300, 48 % men<br>Age: 60.6 ± 9.6                                                   | First-generation DSCT  | 169 (56)                                    | 54 (32)                                          | 1–400 (136)<br>>400 (33)                                  | 27 (20)§<br>27 (82)§                            |
| Wang (2019)                                      | N = 1753, 46 % men<br>Age: 57 ± 12                                                     | Second-generation DSCT | 838 (48)                                    | 208 (30)                                         | > 0 (838)<br>> 100 (91)                                   | 208 (30)<br>61 (67)                             |
| <b>Low and intermediate pre-test probability</b> |                                                                                        |                        |                                             |                                                  |                                                           |                                                 |
| van Werkhoven (2009)                             | N = 432, 59 % male<br>Age: 58 ± 11                                                     | 64-slice MDCT          | 285 (66)                                    | 103 (36)                                         | 1–99 (122)<br>100–399 (75)<br>400–999 (56)<br>> 1000 (32) | 20 (16)<br>32 (44)<br>29 (52)<br>22 (69)        |
| van Werkhoven (2010)                             | N = 576, 47 % men<br>Age: 56 ± 12<br>Typical: 21 %, atypical: 43 %, non-anginal: 36 %  | 64-slice MDCT          | 334 (58)                                    | 154 (46)                                         | 1–400 (260)<br>>400 (74)                                  | 94 (36)<br>60 (81)                              |
| Villines (2011)                                  | N = 10037, 56 % men<br>Age: 57 ± 11<br>Typical: 13 %                                   | 64-slice MDCT          | 4909 (49)                                   | 1825 (44)                                        |                                                           |                                                 |
| Kim (2012)                                       | N = 2088, 49 % men<br>Age: 59 ± 10<br>Typical: 16 %, atypical: 44 %, non-anginal: 40 % | 64-slice MDCT          | 974 (47)                                    | 396 (41)                                         |                                                           |                                                 |
| Bom (2016)                                       | N = 1551, 38 % men<br>Age: 58 ± 10                                                     | 64-slice MDCT          | 812 (52)                                    | n.r.                                             | 0.1–100 (498)<br>100–400 (215)<br>>400 (99)               | n.r.<br>n.r.<br>n.r.                            |
| Van der Zant (2015)                              | N = 1014, 0 % men<br>Age: 59 ± 10<br>Atypical: 100 %                                   | Second-generation DSCT | 457 (45)                                    | 49 (11)                                          |                                                           |                                                 |

| ▶ Supplementary Table 2 (Continuation)            |                                                                                       |                        |                                             |                                             |                                                   |                                                     |                                                 |
|---------------------------------------------------|---------------------------------------------------------------------------------------|------------------------|---------------------------------------------|---------------------------------------------|---------------------------------------------------|-----------------------------------------------------|-------------------------------------------------|
| First author (year)                               | Population (N, % men, mean age, SD)                                                   | CT system              | Total number of patients with CCS > 0 N (%) | Total number of patients with CCS > 0 N (%) | Total number of patients per CCS > 0 category (N) | Total number of patients per CCS > 0 category N (%) | Total number of OCAD per CCS > 0 category N (%) |
| Senoner (2020)                                    | N = 1451, 49 % men<br>Age: 53 ± 11<br>Symptomatic: 66 %, asymptomatic*: 34 %          | Second-generation DSCT | 162 (11)**                                  | 27 (17)                                     |                                                   |                                                     |                                                 |
| <b>Intermediate pre-test probability</b>          |                                                                                       |                        |                                             |                                             |                                                   |                                                     |                                                 |
| Hulten (2014)                                     | N = 1145, 63 % men<br>Age: 55 ± 12                                                    | 64-slice MDCT          | 662 (58)                                    | 278 (42)                                    |                                                   |                                                     |                                                 |
| Nieman (2009)                                     | N = 471, 57 % men<br>Age: 56 ± 10<br>Typical: 31 %, atypical: 53 %, non-anginal: 16 % | First-generation DSCT  | 288 (61)                                    | 137 (48)                                    | 0.1–10 (48)                                       | 5 (10)                                              |                                                 |
|                                                   |                                                                                       |                        |                                             |                                             | 11–100 (101)                                      | 37 (37)                                             |                                                 |
|                                                   |                                                                                       |                        |                                             |                                             | 101–400 (74)                                      | 37 (51)                                             |                                                 |
|                                                   |                                                                                       |                        |                                             |                                             | >400 (65)                                         | 58 (94)                                             |                                                 |
| Meyer (2012)                                      | N = 383, 62 % men<br>Age: 58 ± 13<br>Typical: 81 %, atypical: 19 %                    | First-generation DSCT  | 262 (68)                                    | 104 (40)                                    | 0.1–10 (63)                                       | 6 (3.8)                                             |                                                 |
|                                                   |                                                                                       |                        |                                             |                                             | 10.1–100 (66)                                     | 15 (23)                                             |                                                 |
|                                                   |                                                                                       |                        |                                             |                                             | 100.1–400 (63)                                    | 29 (46)                                             |                                                 |
|                                                   |                                                                                       |                        |                                             |                                             | >400 (70)                                         | 54 (77)                                             |                                                 |
| Kaczmarek (2013)                                  | N = 1132, 47 % men<br>Age: 58.7 ± 11                                                  | First-generation DSCT  | 464 (41)                                    | 216 (47)                                    | 10–100 (221)                                      | 84 (38)                                             |                                                 |
|                                                   |                                                                                       |                        |                                             |                                             | >100 (243)                                        | 132 (54)                                            |                                                 |
| <b>Intermediate and high pre-test probability</b> |                                                                                       |                        |                                             |                                             |                                                   |                                                     |                                                 |
| Gottlieb (2010)                                   | N = 291, 73 % men<br>Age: 59 ± 10                                                     | 64-slice MDCT          | 219 (75)                                    | 149 (68)                                    | 1–10 (24)                                         | 11 (46)                                             |                                                 |
|                                                   |                                                                                       |                        |                                             |                                             | >10 (195)                                         | 138 (71)                                            |                                                 |
| Dedic (2013)                                      | N = 756, 51 % men<br>Age: 56 ± 10                                                     | First-generation DSCT  | 475 (63)                                    | n. r.                                       | 1–400                                             | n. r.                                               |                                                 |
|                                                   |                                                                                       |                        |                                             |                                             | >400                                              | n. r.                                               |                                                 |
| <b>High pre-test probability</b>                  |                                                                                       |                        |                                             |                                             |                                                   |                                                     |                                                 |
| LaMont (2002)                                     | N = 153, 76 % men<br>Age: 58 ± 9<br>Typical: 37 %, atypical: 39 %, non-anginal: 24 %  | Electron beam CT       | 124 (81)                                    | 110 (89)                                    |                                                   |                                                     |                                                 |
| Drosch (2010)                                     | N = 500, 75 % men<br>Age: 63 ± 10                                                     | 16 or 64-slice MDCT    | 429 (86)                                    | n. r.                                       |                                                   |                                                     |                                                 |

► Supplementary Table 2 (Continuation)

| First author (year)                                          | Population (N, % men, mean age, SD)                                                                  | CT system                              | Total number of patients with CCS > 0 N (%) <sup>a</sup> | Total number of CCS > 0 patients with OCAD N (%) | Total number of patients per CCS > 0 category (N) | Total number of OCAD per CCS > 0 category N (%) |
|--------------------------------------------------------------|------------------------------------------------------------------------------------------------------|----------------------------------------|----------------------------------------------------------|--------------------------------------------------|---------------------------------------------------|-------------------------------------------------|
| <b>Type of symptoms</b>                                      |                                                                                                      |                                        |                                                          |                                                  |                                                   |                                                 |
| Ho (2008)                                                    | N = 664, 84 % men<br>Age: 62 ± 9<br>Atypical: 10 %                                                   | 64-slice MDCT                          | 572 (86)                                                 | 86 (15)                                          | 1–100 (63)                                        | 5 (7.9)                                         |
| Akram (2009)                                                 | N = 210, 47 % men<br>Age: 57 ± 12<br>Typical/atypical: 64 %, non-anginal: 36 %                       | 64-slice MDCT                          | 140 (67)                                                 | 34 (24)                                          | 101–400 (180)                                     | 15 (8.3)                                        |
| Knez (2004)                                                  | N = 2115, 66 % men<br>Age: 62<br>Typical/atypical: 80 %, non-anginal: 20 %                           | Electron beam CT                       | 1789 (85)                                                | 1255 (71)                                        | 401–1000 (186)                                    | 27 (15)                                         |
| Geluk (2008)                                                 | N = 304, 56 % men<br>Age: 55<br>Typical: 19 %, atypical: 74 %, other <sup>b</sup> : 7 %              | Electron beam CT                       | 145 (48)                                                 | 72 (50)                                          | > 1000 (143)                                      | 39 (27)                                         |
| Ueda (2012)                                                  | N = 753, 70 % men<br>Age: 65 ± 11<br>Typical: 29 %, atypical: 20 %, asymptomatic <sup>c</sup> : 51 % | First-generation DSCT                  | 389 (52)                                                 | 149 (38)                                         |                                                   |                                                 |
| <b>Pre-test probability or type of symptoms not reported</b> |                                                                                                      |                                        |                                                          |                                                  |                                                   |                                                 |
| Schmermund (2000)                                            | N = 323, 77 % men<br>Age: 55 ± 11                                                                    | Electron beam CT                       | 206 (64)***                                              | 162 (79)                                         |                                                   |                                                 |
| Feldman (2000)                                               | N = 22, 82 % men<br>Age: 60 ± 9.0                                                                    | Helical CT: double layers of detectors | 14 (65)                                                  | 14 (100)                                         |                                                   |                                                 |
| Kiani (2020)                                                 | N = 219, 55 % men<br>Age: 63 ± 12                                                                    | 192-slice MDCT                         | 91 (42)****                                              | 61 (67)                                          |                                                   |                                                 |

Note: SD = standard deviation. CT = computed tomography. CCS = coronary calcium score. CAD = coronary artery disease. MDCT = multi-detector CT. DSCT = dual-source CT. n.r. = not reported in the article.

<sup>a</sup> percentage of patients with a CCS > 0 in relation to the total population of the study.

\*\* CCS 0.1–0.9.

\*\*\* CCS > 15.

\*\*\*\* CCS > 100.

<sup>a</sup> clinical suspicion of CAD based on prior testing (e.g., resting ECG, exercise ECG test).

<sup>b</sup> arrhythmia, collapse, screening.



► **Supplementary Table 3** Prognostic value of CCS 0 in stable chest pain patients.

| First author/<br>(year)                          | Population<br>(N, % men, mean age, SD)                                                | CT system              | Follow-up duration<br>(mean, SD; median, IQR) | Endpoints                                                                                                                        | Total number of CCS 0<br>patients<br>N (%*) | Total number of CCS<br>patients with MACE<br>(N, %) |
|--------------------------------------------------|---------------------------------------------------------------------------------------|------------------------|-----------------------------------------------|----------------------------------------------------------------------------------------------------------------------------------|---------------------------------------------|-----------------------------------------------------|
| <b>Low pre-test probability</b>                  |                                                                                       |                        |                                               |                                                                                                                                  |                                             |                                                     |
| Kwon<br>(2011)                                   | N = 3979, 44% men<br>Age: 60 ± 10                                                     | 64-slice MDCT          | 2.3 ± 1 years                                 | <ul style="list-style-type: none"> <li>Cardiac death</li> <li>Non-fatal MI</li> <li>UAP</li> <li>Revascularization</li> </ul>    | 2406 (61)                                   | 2 (0.1)                                             |
| Wang<br>(2019)                                   | N = 1753, 46% men<br>Age: 57 ± 12                                                     | Second-generation DSCT | 2.2 years<br>(IQR 1.8–3.7)                    | <ul style="list-style-type: none"> <li>Cardiac death</li> <li>Non-fatal MI</li> <li>Revascularization</li> </ul>                 | 915 (52)                                    | 5 (0.6)                                             |
| <b>Low and intermediate pre-test probability</b> |                                                                                       |                        |                                               |                                                                                                                                  |                                             |                                                     |
| van Werkhoven<br>(2009)                          | N = 432, 59% men<br>Age: 58 ± 11                                                      | 64-slice MDCT          | 2 years<br>(IQR 1.2–2.5)                      | <ul style="list-style-type: none"> <li>All-cause mortality</li> <li>Non-fatal MI</li> <li>Revascularization</li> </ul>           | 147 (34)                                    | 2 (1.1)                                             |
| Nappi<br>(2018)                                  | N = 155, 67% men<br>Age: 63 ± 11<br>Typical: 15%, atypical: 30%                       | 64-slice MDCT          | 6.8 ± 2.8 years                               | <ul style="list-style-type: none"> <li>Cardiac death</li> <li>Non-fatal MI</li> <li>UAP &amp; revascularization</li> </ul>       | 42 (27)                                     | 0 (0)                                               |
| Villines<br>(2011)                               | N = 10037, 56% men<br>Age: 57 ± 11<br>Typical: 13%                                    | 64-slice MDCT          | 2.1 years<br>(IQR 2.0)                        | <ul style="list-style-type: none"> <li>All-cause mortality</li> <li>Non-fatal MI</li> <li>Revascularization</li> </ul>           | 4738 (47)                                   | 44 (0.9)                                            |
| Kim<br>(2012)                                    | N = 2088, 49% men<br>Age: 59 ± 0<br>Typical: 16%, atypical: 44%, non-anginal: 40%     | 64-slice MDCT          | 2.8 ± 0.4 years                               | <ul style="list-style-type: none"> <li>Cardiac death</li> <li>Non-fatal MI</li> <li>UAP</li> <li>Revascularization</li> </ul>    | 1114 (53)                                   | 14 (1.3)                                            |
| Bom<br>(2016)                                    | N = 1551, 38% men<br>Age: 58 ± 10                                                     | 64-slice MDCT          | 1.7 years<br>(IQR n.r.)                       | <ul style="list-style-type: none"> <li>All-cause mortality</li> <li>MI</li> <li>Revascularization</li> </ul>                     | 739 (47)                                    | 2 (0.3)                                             |
| Budoff<br>(2017)                                 | N = 4209, 49% men<br>Age: 61 ± 8<br>Typical: 11.2%, atypical: 78%, non-anginal: 10.6% | 64-slice MDCT          | 2.1 years<br>(IQR 1.5–2.8)                    | <ul style="list-style-type: none"> <li>Cardiac death</li> <li>MI</li> </ul>                                                      | 1457 (35)                                   | 21 (1.4)                                            |
| Dedic<br>(2011)                                  | N = 471, 52% men<br>Age: 56 ± 10<br>Typical: 32%, atypical: 52%, non-anginal: 16%     | First-generation DSCT  | 2.6 years<br>(IQR 2.1–3.2)                    | <ul style="list-style-type: none"> <li>Cardiac death</li> <li>Non-fatal MI</li> <li>UAP</li> <li>Revascularization</li> </ul>    | 151 (32)                                    | 2 (1.3)                                             |
| Senoner<br>(2020)                                | N = 1451, 49% men<br>Age: 53 ± 11<br>Symptomatic: 66%, asymptomatic: 34%              | Second-generation DSCT | 6.6 ± 4.2 years                               | <ul style="list-style-type: none"> <li>All-cause and cardiac mortality</li> <li>Composite of non-fatal and fatal MACE</li> </ul> | 1289 (90)                                   | 7 (0.6) <sup>†</sup>                                |
| <b>Intermediate pre-test probability</b>         |                                                                                       |                        |                                               |                                                                                                                                  |                                             |                                                     |

▶ Supplementary Table 3 (Continuation)

| First author/<br>(year)                                      | Population<br>(N, % men, mean age, SD)                                                              | CT system        | Follow-up duration<br>(mean, SD; median, IQR) | Endpoints                                                                                                                     | Total number of CCS 0<br>patients<br>N (%) | Total number of CCS<br>patients with MACE<br>(N, %) |
|--------------------------------------------------------------|-----------------------------------------------------------------------------------------------------|------------------|-----------------------------------------------|-------------------------------------------------------------------------------------------------------------------------------|--------------------------------------------|-----------------------------------------------------|
| Petretta<br>(2012)                                           | N = 326, 67% men<br>Age: 62 ± 12<br>Typical: 32%, atypical: 63%, non-anginal: 5%                    | 64-slice MDCT    | 2.2 ± 1.0 years                               | <ul style="list-style-type: none"> <li>Cardiac death</li> <li>Non-fatal MI</li> <li>UAP</li> </ul>                            | 106 (33)                                   | 0 (0)                                               |
| Hulten<br>(2014)                                             | N = 1145, 63% men<br>Age: 55 ± 12                                                                   | 64-slice MDCT    | 2.4 years<br>(IQR 1.5–3.5)                    | <ul style="list-style-type: none"> <li>Death</li> <li>MI</li> <li>UAP</li> <li>Late revascularization</li> </ul>              | 483 (42)                                   | 2 (0.5)                                             |
| Parma<br>(2016)                                              | N = 588, 36% men<br>Age: 61 ± 10                                                                    | 64-slice MDCT    | 1.9 years<br>(IQR 1.6–2.3)                    | <ul style="list-style-type: none"> <li>Cardiac death</li> <li>Non-fatal MI</li> <li>Revascularization</li> </ul>              | 239 (41)                                   | 0 (0)                                               |
| <b>Intermediate and high pre-test probability</b>            |                                                                                                     |                  |                                               |                                                                                                                               |                                            |                                                     |
| Mittal<br>(2017)                                             | N = 3914, 50% men<br>Age: 57 ± 12<br>Typical: 19%, atypical: 42%, non-anginal: 25%,<br>dyspnea: 15% | 64-slice MDCT    | 5.2 ± 2.8 years<br>total follow-up 13 years   | <ul style="list-style-type: none"> <li>All-cause death</li> </ul>                                                             | 1978 (51)                                  | 28 (1.4)**                                          |
| <b>Type of symptoms</b>                                      |                                                                                                     |                  |                                               |                                                                                                                               |                                            |                                                     |
| Geluk<br>(2008)                                              | N = 304, 56% men<br>Age: 55<br>Typical: 19%, atypical: 74%, other <sup>†</sup> : 7%                 | Electron beam CT | 1.0 ± 0.3 years                               | <ul style="list-style-type: none"> <li>Coronary death</li> <li>MI</li> <li>Revascularization</li> </ul>                       | 159 (52)***                                | 0 (0)                                               |
| Hou<br>(2012)                                                | N = 4425, 62% men<br>Age: 60 ± 11<br>Typical: 6%, atypical: 16%, non-anginal: 47%                   | 64-slice MDCT    | 3 years<br>(IQR 2.6–3.3)                      | <ul style="list-style-type: none"> <li>Cardiac death</li> <li>MI</li> <li>Revascularization</li> </ul>                        | 2785 (63)                                  | 56 (2.1)                                            |
| <b>Pre-test probability or type of symptoms not reported</b> |                                                                                                     |                  |                                               |                                                                                                                               |                                            |                                                     |
| Schmermund<br>(2004)                                         | N = 255, 71% men<br>Age: 55 ± 11                                                                    | Electron beam CT | 3.1 years<br>(range 0.2–3.5 years)            | <ul style="list-style-type: none"> <li>Cardiac death</li> <li>MI</li> <li>Revascularization</li> </ul>                        | 150 (59)****                               | 5 (3.4)                                             |
| Rijlaardam-<br>Hermesen<br>(2011)                            | N = 134, 19% men<br>Age: 57 ± 9                                                                     | 16-slice MDCT    | 3.7 years<br>(IQR 2.9–4.5)                    | <ul style="list-style-type: none"> <li>Cardiac death</li> <li>Non-fatal MI</li> <li>UAP &amp; revascularization</li> </ul>    | 134 (100)                                  | 0 (0)                                               |
| Marfei<br>(2011)                                             | N = 722, 66% men<br>Age: 63 ± 11                                                                    | 64-slice MDCT    | 1.6 ± 0.3 years                               | <ul style="list-style-type: none"> <li>Cardiac death</li> <li>Non-fatal MI</li> <li>UAP</li> <li>Revascularization</li> </ul> | n.r.                                       | n.r. (6)                                            |
| Versteylen<br>(2013)                                         | N = 283, 51% men<br>Age: 54 ± 10                                                                    | 64-slice MDCT    | 2.1 years<br>(IQR 1.8–2.8)                    | <ul style="list-style-type: none"> <li>ACS</li> <li>Revascularization</li> </ul>                                              | 149 (53)                                   | 1 (0.7)                                             |

► **Supplementary Table 3** (Continuation)

| First author/<br>(year) | Population<br>(N, % men, mean age, SD) | CT system     | Follow-up duration<br>(mean, SD; median, IQR) | Endpoints                                                                                                                               | Total number of CCS 0<br>patients<br>N (%*) | Total number of CCS<br>patients with MACE<br>(N, %) |
|-------------------------|----------------------------------------|---------------|-----------------------------------------------|-----------------------------------------------------------------------------------------------------------------------------------------|---------------------------------------------|-----------------------------------------------------|
| Shah<br>(2014)          | N = 7078, 49% men<br>Age: n. r.        | 64-slice MDCT | 2.1 years<br>(IQR 1.5–3.2)                    | <ul style="list-style-type: none"> <li>▪ Overall mortality</li> </ul>                                                                   | 4047 (57)                                   | 471 (1.1)                                           |
| Yamamoto<br>(2018)      | N = 736, 62% men<br>Age: 65 ± 10       | 64-slice MDCT | 6.5 years<br>(IQR 1.0–12)                     | Composite of: <ul style="list-style-type: none"> <li>▪ Cardiac death</li> <li>▪ Non-fatal MI</li> <li>▪ Non-fatal stroke</li> </ul>     | 270 (37)                                    | 3.9†                                                |
| Shiga<br>(2020)         | N = 502, 50% men<br>Age: 65 ± 10       | 64-slice MDCT | 3.5 ± 0.6 years<br>total follow-up 5 years    | <ul style="list-style-type: none"> <li>▪ Cardiac death</li> <li>▪ MI</li> <li>▪ Revascularization</li> <li>▪ Ischemic stroke</li> </ul> | 202 (40)                                    | 9 (4.5)                                             |

Note: description of patients with major adverse cardiac events (MACE) with a negative and positive coronary calcium score (CCS) in articles that described the pre-test probability and/or typicality of angina pectoris symptoms. IQR = interquartile range. ACS = acute coronary syndrome.

\* percentages of total CCS 0 patients of the total populations.

† all-cause mortality not included.

\*\* non-cardiac related deaths.

\*\*\* CCS < 10.

\*\*\*\* CCS < 100

‡ arrhythmia, collapse, screening.

† cumulative rate at 10 years.

► **Supplementary Table 4** Prognostic value of CCS > 0 in stable chest pain patients.

| First author/<br>(year)                          | Population<br>(N, % men, mean age, SD)                                                | CT system                 | Follow-up duration and<br>endpoints<br>(mean, SD; median, IQR)                                                                                   | Total number of<br>patients with<br>CCS > 0<br>N (%*) | Total number of<br>CCS > 0 patients<br>with MACE<br>N (%) | Total number of<br>patients per<br>CCS > 0 category<br>(N) | Total number of<br>MACE per CCS > 0<br>category<br>N (%) |
|--------------------------------------------------|---------------------------------------------------------------------------------------|---------------------------|--------------------------------------------------------------------------------------------------------------------------------------------------|-------------------------------------------------------|-----------------------------------------------------------|------------------------------------------------------------|----------------------------------------------------------|
| <b>Low pre-test probability</b>                  |                                                                                       |                           |                                                                                                                                                  |                                                       |                                                           |                                                            |                                                          |
| Kwon<br>(2011)                                   | N = 3979, 44% men<br>Age: 60 ± 10                                                     | 64-slice MDCT             | 2.3 ± 1 years<br><ul style="list-style-type: none"> <li>Cardiac death</li> <li>Non-fatal MI</li> <li>UAP</li> <li>Revascularization</li> </ul>   | 1573 (39)                                             | 103 (5.4)                                                 |                                                            |                                                          |
| Wang<br>(2019)                                   | N = 1753, 46% men<br>Age: 57 ± 12                                                     | Second-generation<br>DSCT | 2.2 years (IQR 1.8–3.7)<br><ul style="list-style-type: none"> <li>Cardiac death</li> <li>Non-fatal MI</li> <li>Revascularization</li> </ul>      | 838 (48)                                              | 17 (2.1)                                                  |                                                            |                                                          |
| <b>Low and intermediate pre-test probability</b> |                                                                                       |                           |                                                                                                                                                  |                                                       |                                                           |                                                            |                                                          |
| van Werkhoven<br>(2009)                          | N = 432, 59% men<br>Age: 58 ± 11                                                      | 64-slice MDCT             | 2 years (IQR 1.2–2.5)<br><ul style="list-style-type: none"> <li>All-cause mortality</li> <li>Non-fatal MI</li> <li>Revascularization</li> </ul>  | 285 (66)                                              | 26 (9.2)                                                  | 1–99 (122)<br>100–399 (75)<br>400–999 (56)<br>>1000 (32)   | n.r. (1.4%)<br>n.r. (3.7%)<br>n.r. (4.8%)<br>n.r. (8.5%) |
| Nappi<br>(2018)                                  | N = 155, 67% men<br>Age: 63 ± 11<br>Typical: 15%,<br>atypical: 30%                    | 64-slice MDCT             | 6.8 ± 2.8 years<br><ul style="list-style-type: none"> <li>Cardiac death</li> <li>Non-fatal MI</li> <li>UAP &amp; revascularization</li> </ul>    | 114 (74)                                              | 22 (19)                                                   | 1–300 (98)<br>>300 (16)                                    | 14 (15)<br>8 (50)                                        |
| Villines<br>(2011)                               | N = 10 037, 56% men<br>Age: 57 ± 11<br>Typical: 13%                                   | 64-slice MDCT             | 2.1 years (IQR 2.0)<br><ul style="list-style-type: none"> <li>All-cause mortality</li> <li>Non-fatal MI</li> <li>Revascularization</li> </ul>    | 4169 (42)                                             | 191 (4.6)                                                 |                                                            |                                                          |
| Kim<br>(2012)                                    | N = 2088, 49% men<br>Age: 59 ± 10<br>Typical: 16%, atypical: 44%,<br>non-anginal: 40% | 64-slice MDCT             | 2.8 ± 0.4 years<br><ul style="list-style-type: none"> <li>Cardiac death</li> <li>Non-fatal MI</li> <li>UAP</li> <li>Revascularization</li> </ul> | 974 (47)                                              | 46 (4.8)                                                  |                                                            |                                                          |
| Born<br>(2016)                                   | N = 1551, 38% men<br>Age: 58 ± 10                                                     | 64-slice MDCT             | 1.7 years (IQR n.r.)<br><ul style="list-style-type: none"> <li>All-cause mortality</li> <li>MI</li> <li>Revascularization</li> </ul>             | 812 (52)                                              | 21 (2.6)                                                  | 0.1–100 (498)<br>100–400 (215)<br>>400 (99)                | 5 (1)<br>9 (4.2)<br>7 (7.1)                              |

► Supplementary Table 4 (Continuation)

| First author/ (year)                              | Population (N, % men, mean age, SD)                                                                   | CT system              | Follow-up duration and endpoints (mean, SD; median, IQR)                                                                                                 | Total number of patients with CCS > 0 N (%) | Total number of CCS > 0 patients with MACE N (%) | Total number of patients per CCS > 0 category (N)     | Total number of MACE per CCS > 0 category N (%) |
|---------------------------------------------------|-------------------------------------------------------------------------------------------------------|------------------------|----------------------------------------------------------------------------------------------------------------------------------------------------------|---------------------------------------------|--------------------------------------------------|-------------------------------------------------------|-------------------------------------------------|
| Budoff (2017)                                     | N = 4209, 49 % men<br>Age: 61 ± 8<br>Typical: 11.2 %, atypical: 78 %, non-anginal: 10.6 %             | 64-slice MDCT          | 2.1 years (IQR 1.5–2.8)<br><ul style="list-style-type: none"> <li>Cardiac death</li> <li>MI</li> </ul>                                                   | 2752 (65)                                   | 133 (4.8)                                        |                                                       |                                                 |
| Dedic (2011)                                      | N = 471, 52 % men<br>Age: 56 ± 10<br>Typical: 32 %, atypical: 52 %, non-anginal: 16 %                 | First-generation DSCT  | 2.6 years (IQR 2.1–3.2)<br><ul style="list-style-type: none"> <li>Cardiac death</li> <li>Non-fatal MI</li> <li>UAP</li> <li>Revascularization</li> </ul> | 272 (58)                                    | 28 (10)                                          | 1–10 (51)<br>10–100 (92)<br>100–400 (66)<br>>400 (63) | 2 (4)<br>10 (11)<br>7 (11)<br>9 (14)            |
| Senoner (2020)                                    | N = 1451, 49 % men<br>Age: 53 ± 11<br>Symptomatic: 66 %, asymptomatic: 34 %                           | Second-generation DSCT | 6.6 ± 4.2 years<br><ul style="list-style-type: none"> <li>All-cause and cardiac mortality</li> <li>Composite of non-fatal and fatal MACE</li> </ul>      | 162 (11)**                                  | 1 (0.6)†                                         |                                                       |                                                 |
| <b>Intermediate pre-test probability</b>          |                                                                                                       |                        |                                                                                                                                                          |                                             |                                                  |                                                       |                                                 |
| Petretta (2012)                                   | N = 326, 67 % men<br>Age: 62 ± 12<br>Typical: 32 %, atypical: 63 %, non-anginal: 5 %                  | 64-slice MDCT          | 2.2 ± 1.0 years<br><ul style="list-style-type: none"> <li>Cardiac death</li> <li>Non-fatal MI</li> <li>UAP</li> </ul>                                    | 220 (68)                                    | 34 (16)                                          | 1–100 (138)<br>101–400 (70)<br>>400 (12)              | 9 (6.7)<br>19 (27)<br>6 (50)                    |
| Hulten (2014)                                     | N = 1145, 63 % men<br>Age: 55 ± 12                                                                    | 64-slice MDCT          | 2.4 years (IQR 1.5–3.5)<br><ul style="list-style-type: none"> <li>Death</li> <li>MI</li> <li>UAP</li> <li>Late revascularization</li> </ul>              | 662 (58)                                    | 14 (2.1)                                         |                                                       |                                                 |
| Parma (2016)                                      | N = 588, 36 % men<br>Age: 61 ± 10                                                                     | 64-slice MDCT          | 1.9 years (IQR 1.6–2.3)<br><ul style="list-style-type: none"> <li>Cardiac death</li> <li>Non-fatal MI</li> <li>Revascularization</li> </ul>              | 349 (59)                                    | 119 (34)                                         |                                                       |                                                 |
| <b>Intermediate and high pre-test probability</b> |                                                                                                       |                        |                                                                                                                                                          |                                             |                                                  |                                                       |                                                 |
| Mittal (2017)                                     | N = 3914, 50 % men<br>Age: 57 ± 12<br>Typical: 19 %, atypical: 42 %, non-anginal: 25 %, dyspnea: 15 % | 64-slice MDCT          | 5.2 ± 2.8 years<br><ul style="list-style-type: none"> <li>All-cause death</li> </ul>                                                                     | 1936 (39)                                   | 119 (6.1)                                        |                                                       |                                                 |

Supplementary Table 4 (Continuation)

| First author/<br>(year)                                      | Population<br>(N, % men, mean age, SD)                                                 | CT system        | Follow-up duration and<br>endpoints<br>(mean, SD; median, IQR)                                                                                        | Total number of<br>patients with<br>CCS > 0<br>N (%*) | Total number of<br>CCS > 0 patients<br>with MACE<br>N (%) | Total number of<br>patients per<br>CCS > 0 category<br>(N)           | Total number of<br>MACE per CCS > 0<br>category<br>N (%) |
|--------------------------------------------------------------|----------------------------------------------------------------------------------------|------------------|-------------------------------------------------------------------------------------------------------------------------------------------------------|-------------------------------------------------------|-----------------------------------------------------------|----------------------------------------------------------------------|----------------------------------------------------------|
| <b>Type of symptoms</b>                                      |                                                                                        |                  |                                                                                                                                                       |                                                       |                                                           |                                                                      |                                                          |
| Geluk<br>(2008)                                              | N = 304, 56% men<br>Age: 55<br>Typical: 19%, atypical: 74%,<br>other <sup>a</sup> : 7% | Electron beam CT | 1.0 ± 0.3 years<br><ul style="list-style-type: none"> <li>Coronary death</li> <li>MI</li> <li>Revascularization</li> </ul>                            | 145 (48)                                              | 52 (36)                                                   | 10–399 (103)<br>≥ 400 (42)                                           | 11 (11)<br>17 (41)                                       |
| Hou<br>(2012)                                                | N = 4425, 62% men<br>Age: 60 ± 11<br>Typical: 6%, atypical: 16%,<br>non-anginal: 47%   | 64-slice MDCT    | 3 years (IQR 2.6–3.3)<br><ul style="list-style-type: none"> <li>Cardiac death</li> <li>MI</li> <li>Revascularization</li> </ul>                       | 1640 (37)                                             | 290 (18)                                                  | 1–100 (813)<br>101–400 (483)<br>> 400 (344)                          | 103 (13)<br>74 (16)<br>113 (34)                          |
| <b>Pre-test probability or type of symptoms not reported</b> |                                                                                        |                  |                                                                                                                                                       |                                                       |                                                           |                                                                      |                                                          |
| Schmermund<br>(2004)                                         | N = 255, 71% men<br>Age: 55 ± 11                                                       | Electron beam CT | 3.1 (range 0.2–3.5 years)<br><ul style="list-style-type: none"> <li>Cardiac death</li> <li>MI</li> <li>Revascularization</li> </ul>                   | 105 (41)***                                           | 35 (34)                                                   |                                                                      |                                                          |
| Rijlaardam-<br>Hermesen<br>(2011)                            | N = 134, 19% men<br>Age: 57 ± 9                                                        | 16-slice MDCT    | 3.7 years (IQR 2.9–4.5)<br><ul style="list-style-type: none"> <li>Cardiac death</li> <li>Non-fatal MI</li> <li>UAP &amp; revascularization</li> </ul> | n. r.                                                 | n. r.                                                     | n. r.                                                                | n. r.                                                    |
| Maffei<br>(2011)                                             | N = 722, 66% men<br>Age: 63 ± 11                                                       | 64-slice MDCT    | 1.6 ± 0.3 years<br><ul style="list-style-type: none"> <li>Cardiac death</li> <li>Non-fatal MI</li> <li>UAP</li> <li>Revascularization</li> </ul>      |                                                       |                                                           | 11–100 (n. r.)<br>101–400 (21)<br>401–1000 (n. r.)<br>> 1000 (n. r.) | n. r. (10)<br>3 (15)<br>n. r. (23)<br>n. r. (34)         |
| Versteylen<br>(2013)                                         | N = 283, 51% men<br>Age: 54 ± 10                                                       | 64-slice MDCT    | 2.1 years (IQR 1.8–2.8)<br><ul style="list-style-type: none"> <li>ACS</li> <li>revascularization</li> </ul>                                           | 134 (48)                                              | 5 (3.8)                                                   |                                                                      |                                                          |
| Shah<br>(2014)                                               | N = 7078, 49% men<br>Age: n. r.                                                        | 64-slice MDCT    | 2.1 years (IQR 1.5–3.2)<br><ul style="list-style-type: none"> <li>Overall mortality</li> </ul>                                                        | 3031 (43)                                             | 165 (5.4)                                                 | 1–10 (524)<br>11–99 (1300)<br>100–399 (823)<br>≥ 400 (384)           | 41 (1.5)<br>86 (2.4)<br>29 (4.1)<br>9 (10)               |

► Supplementary Table 4 (Continuation)

| First author/<br>(year) | Population<br>(N, % men, mean age, SD) | CT system     | Follow-up duration and<br>endpoints<br>(mean, SD; median, IQR)                                     | Total number of<br>patients with<br>CCS > 0<br>N (%)* | Total number of<br>CCS > 0 patients<br>with MACE<br>N (%) | Total number of<br>patients per<br>CCS > 0 category<br>(N) | Total number of<br>MACE per CCS > 0<br>category<br>N (%) |
|-------------------------|----------------------------------------|---------------|----------------------------------------------------------------------------------------------------|-------------------------------------------------------|-----------------------------------------------------------|------------------------------------------------------------|----------------------------------------------------------|
| Yamamoto<br>(2018)      | N = 736, 62% men<br>Age: 65 ± 10       | 64-slice MDCT | 6.5 years (IQR 1.0–12)<br>Composite of:<br>■ Cardiac death<br>■ Non-fatal MI<br>■ Non-fatal stroke | 470 (64)                                              | 39 (8.3)                                                  | 1–199 (228)<br>100–399 (162)<br>≥400 (80)                  | 9.2 <sup>‡</sup><br>12 <sup>‡</sup><br>18 <sup>‡</sup>   |
| Shiga<br>(2020)         | N = 502, 50% men<br>Age: 65 ± 10       | 64-slice MDCT | 3.5 ± 0.6 years<br>■ Cardiac death<br>■ MI<br>■ Revascularization<br>■ Ischemic stroke             | 300 (60)                                              | 35 (12)                                                   |                                                            |                                                          |

Note: description of patients with major adverse cardiac events (MACE) with a negative and positive coronary calcium score (CCS) in articles that described the pre-test probability and/or typicality of angina pectoris symptoms. IQR = interquartile range. ACS = acute coronary syndrome.

\* percentages of total CCS 0 patients of the total populations.

† event rate.

\*\* CCS 0.1–0.9

†† all-cause mortality not included.

\*\*\* CCS > 100.

‡ arrhythmia, collapse, screening.

‡ cumulative rate at 10 years.
